# Supplementary material
Source: ML conference proceedings conference paper supplement (https://proceedings.neurips.cc/paper_files/paper/2016/hash/6ef80bb237adf4b6f77d0700e1255907-Abstract.html)
Supplement: Supplementary file [file 6ef80bb237adf4b6f77d0700e1255907-Supplemental.zip]

## A Detailed Proofs in Sections 2 and 3

### A.1 Proof of Lemma 1

*Proof.* We only need to show

$$\mathbb{E}(\mathbf{v}^\top \mathbf{Y})^4 = 3 + (\psi - 3) \sum_{i=1}^d v_i^4. \quad (\text{A.1})$$

Note due to the following well-known expansion [9]

$$\left(\sum x_i\right)^4 = \sum x_i^4 + 4 \sum x_i^3 x_j + 6 \sum x_i^2 x_j^2 + 12 \sum x_{i_1}^2 x_{i_2} x_{i_3} + 24 \sum x_{i_1} x_{i_2} x_{i_3} x_{i_4},$$

where the summations above iterate through all monomial terms. Plugging in  $x_i = v_i Y_i$  and taking expectations, we conclude that under Assumption 1

$$\begin{aligned} \mathbb{E}(\mathbf{v}^\top \mathbf{Y})^4 &= \sum_{i=1}^d v_i^4 \mathbb{E}(Y_i^4) + 6 \sum_{1 \leq i < j \leq d} v_i^2 v_j^2 \mathbb{E}(Y_i^2) \mathbb{E}(Y_j^2) \\ &= \psi \sum_{i=1}^d v_i^4 + 6 \sum_{1 \leq i < j \leq d} v_i^2 v_j^2. \end{aligned} \quad (\text{A.2})$$

Note that from the constraint of our optimization problem Eq. (2.2), we have

$$1 = \|\mathbf{v}\|^4 = \left(\sum_{i=1}^d v_i^2\right)^2 = \sum_{i=1}^d v_i^4 + 2 \sum_{1 \leq i < j \leq d} v_i^2 v_j^2. \quad (\text{A.3})$$

Combining both Eqs. (A.2) and (A.3) we conclude Eq. (A.1) and hence the lemma.  $\blacksquare$

### A.2 Proof of Proposition 1

*Proof.* Let  $\mathcal{F}_n = \sigma(\mathbf{u}^{(n')}) : n' \leq n$  be the  $\sigma$ -field filtration generated by the iteration  $\mathbf{u}^{(n)}$ , viewed as a stochastic process. From the recursion equation in Eq. (2.3) we have a Markov transition kernel  $p(\mathbf{u}, \mathcal{S})$  such that for each Borel set  $\mathcal{A} \subseteq \mathcal{S}^{d-1}$

$$\mathbb{P}(\mathbf{u}^{(n)} \in \mathcal{A} \mid \mathcal{F}_{n-1}) = p(\mathbf{u}^{(n-1)}, \mathcal{A}).$$

Therefore it is a time-homogeneous Markov chain. The strong Markov property holds directly from Markov property, see [16] as a reference. This proves Proposition 1.  $\blacksquare$

### A.3 Proof of Theorem 1

We first use the standard one-step analysis and conclude the following proposition, whose proof is deferred to Subsection C.1.

**Proposition 3.** For brevity let  $\mathbf{v} = \mathbf{v}^{(0)}$  and  $\mathbf{Y} = \mathbf{Y}^{(1)}$ , separately. Under Assumption 1, when

$$B^2 \beta \leq 2/3, \quad (\text{A.4})$$

for each  $k = 1, 2, \dots, d$  and  $n \geq 0$  we have the following:

- (i) There exists a random variable  $R_k$  that depends solely on  $\mathbf{v}, \mathbf{Y}$  with  $|R_k| \leq 9B^4\beta^2$  almost surely, such that the increment  $v_k^{(1)} - v_k^{(0)}$  can be represented as

$$v_k^{(1)} - v_k^{(0)} = \beta \left( (\mathbf{v}^\top \mathbf{Y})^3 Y_k - v_k (\mathbf{v}^\top \mathbf{Y})^4 \right) + R_k; \quad (\text{A.5})$$

- (ii) The increment of  $v_k$  on coordinate  $k$  has the following bound

$$\left| v_k^{(1)} - v_k^{(0)} \right| \leq 8B^2\beta; \quad (\text{A.6})$$

- (iii) There exists a deterministic function  $E_k(\mathbf{v})$  with  $\sup_{\mathbf{v} \in \mathcal{S}^{d-1}} |E_k(\mathbf{v})| \leq 9B^4\beta^2$ , such that the conditional expectation of the increment  $v_k^{(1)} - v_k^{(0)}$  is

$$\mathbb{E} \left[ v_k^{(1)} - v_k^{(0)} \mid \mathbf{v}^{(0)} = \mathbf{v} \right] = \beta \left[ \psi - 3 \right] v_k \left( v_k^2 - \sum_{i=1}^d v_i^4 \right) + E_k(\mathbf{v}). \quad (\text{A.7})$$

In Proposition 3, (i) characterizes the relationship between the increment on  $v_k$  and the online sample, and (ii) bounds such increment. From (iii) we can compute the infinitesimal mean and variance for SGD for tensor method and conclude that as the stepsize  $\beta \rightarrow 0^+$ , the iterates generated by Eq. (2.3), under the time scaling that speeds up the algorithm by a factor  $\beta^{-1}$ , can be globally approximated by the solution to the following ODE system in Eq. (3.2) as

$$\frac{dV_k}{dt} = |\psi - 3| V_k \left( V_k^2 - \sum_{i=1}^d V_i^4 \right), \quad k = 1, \dots, d.$$

To characterize such approximation we use theory of weak convergence to diffusions [17, 40]. We remind the readers of the definition of weak convergence  $Z^\beta \Rightarrow Z$  in stochastic processes: for any  $0 \leq t_1 < t_2 < \dots < t_n$  the following convergence in distribution occurs as  $\beta \rightarrow 0^+$

$$(Z^\beta(t_1), Z^\beta(t_2), \dots, Z^\beta(t_n)) \xrightarrow{d} (Z(t_1), Z(t_2), \dots, Z(t_n)).$$

To highlight the dependence on  $\beta$  we add it in the superscripts of iterates  $\mathbf{v}^{\beta, (n)} = \mathbf{v}^{(n)}$ .

*Proof of Theorem 1.* Let  $V_k^\beta(t) = v_k^{\beta, (\lfloor t\beta^{-1} \rfloor)}$ . Proposition 3 implies for coordinate  $k$   $V_k^\beta(t)$  satisfies

$$V_k^\beta(\beta) - V_k^\beta(0) = \beta \left( (\mathbf{v}^\top \mathbf{Y})^3 Y_k - v_k (\mathbf{v}^\top \mathbf{Y})^4 \right) + R_k,$$

where  $|R_k| \leq 9B^4\beta^2$ . Eq. (A.7) implies that if the infinitesimal mean is [17]

$$\begin{aligned} \left. \frac{d}{dt} \mathbb{E} V_k^\beta(t) \right|_{t=0} &= \beta^{-1} \mathbb{E} \left[ V_k^\beta(\beta) - v_k \mid \mathbf{V}^\beta(0) = \mathbf{v} \right] \\ &= |\psi - 3| v_k \left( v_k^2 - \sum_{i=1}^d v_i^4 \right) + \mathcal{O}(B^4\beta). \end{aligned}$$

Using Eq. (A.6) we have the infinitesimal variance

$$\begin{aligned} \left. \frac{d}{dt} \mathbb{E} (V_k^\beta(t) - v_k)^2 \right|_{t=0} &= \beta^{-1} \mathbb{E} \left[ (V_k^\beta(\beta) - v_k)^2 \mid V_k^\beta(0) = v_k \right] \\ &\leq \beta^{-1} \cdot C^2 B^4 \beta^2, \end{aligned}$$

which tends to 0 as  $\beta \rightarrow 0^+$ . Let  $V_k(t)$  be the solution to ODE system Eq. (3.2) with initial values  $V_k(0) = v_k^{\beta, (0)}$ . Applying standard infinitesimal generator argument [17, Corollary 4.2 in Sec. 7.4] one can conclude that as  $\beta \rightarrow 0^+$ , the Markov process  $V_k^\beta(t)$  converges weakly to  $V_k(t)$ . ■

#### A.4 Proof of Proposition 2

For simplicity we denote in the proofs that the initial value  $V_k(0) = V_k, k = 1, \dots, d$ . Also, throughout this subsection we assume without loss of generality that  $V_1^2$  is maximal among  $V_k^2, k = 1, \dots, d$ , and furthermore

$$V_1^2 \geq 2 \max_{k>1} V_k^2. \quad (\text{A.8})$$

**Lemma 2.** For  $\mathbf{V} \in \mathcal{S}^{d-1}$  that satisfies Eq. (A.8), then we have for all  $t \geq 0$

$$(V_1(t))^2 \geq 2 \max_{k>1} (V_k(t))^2. \quad (\text{A.9})$$

*Proof.* We compare the coordinate between two distinct coordinates  $i, j$  and have by calculus that for all  $k > 1$

$$\frac{d}{dt} \log \left( \frac{V_k(t)}{V_1(t)} \right)^2 = 2 |\psi - 3| (V_k^2(t) - V_1^2(t)). \quad (\text{A.10})$$

So if initially Eq. (A.8) is valid then  $\log(V_k^2(t)/V_1^2(t))$  is nondecreasing, which indicates for all  $t > 0$

$$\log \left( \frac{V_k(t)}{V_1(t)} \right)^2 \leq \log \left( \frac{V_k}{V_1} \right)^2 \leq \log \frac{1}{2}.$$

Rearranging the above display and taking maximum over  $k = 2, \dots, d$  gives Eq. (A.9). ■

We then establish a lemma that gives the lower bound of drift term related to  $V_1$ . To bound the bracket term on the right hand of ODE, one has

$$V_1^2 - \sum_{k=1}^d V_k^4 = V_1^2 - V_1^4 - \sum_{k=2}^d V_k^4 \leq V_1^2(1 - V_1^2). \quad (\text{A.11})$$

which gives us an upper bound. To obtain a lower bound estimate we first state a lemma stating that the gap between the first and all other coordinates is nondecreasing.

**Lemma 3.** For  $V \in \mathcal{S}^{d-1}$  that satisfies Eq. (A.8) we have

$$V_1^2(1 - V_1^2) \geq V_1^2 - \sum_{k=1}^d V_k^4 \geq \frac{V_1^2}{2}(1 - V_1^2). \quad (\text{A.12})$$

*Proof.* Note Hölder's inequality gives

$$\sum_{k>1} V_k^4 \leq \left( \max_{k>1} V_k^2 \right) \left( \sum_{k>1} V_k^2 \right), \quad (\text{A.13})$$

where the equality in the above display holds when  $V_2^2 = \dots = V_d^2$ . Using Eq. (A.8) and (A.13) one has

$$\begin{aligned} V_1^2 - \sum_{k=1}^d V_k^4 &\geq V_1^2 - V_1^4 - \left( \max_{k>1} V_k^2 \right) (1 - V_1^2) \\ &\geq V_1^2 - V_1^4 - \frac{V_1^2}{2} (1 - V_1^2) = \frac{V_1^2}{2} (1 - V_1^2). \end{aligned} \quad (\text{A.14})$$

This completes the proof. ■

**Lemma 4.** For the ODE in Eq. (3.4) which is

$$\frac{dy}{dt} = y^2(1 - y), \quad (\text{A.15})$$

with  $y(0) = 2/(d+1)$ . By letting  $T_0$  be such that  $y(T_0) = 1 - \delta$ , we have

$$T_0 \leq d - 3 + 4 \log(2\delta)^{-1}. \quad (\text{A.16})$$

*Proof.* Let  $T_1$  be the traverse time from  $2/(d+1)$  to  $1/2$ , and  $T_2$  be from  $1/2$  to  $1 - \delta$ . We have for  $y \in [0, 1/2]$

$$\frac{1}{2}y^2 \leq \frac{dy}{dt} \leq y^2.$$

Therefore by comparison theorem of ODE [23],  $T_1^* \leq T_1 \leq 2T_1^*$  where  $y_1(t) = \frac{y_0}{1-y_0 t}$  solves  $dy_1/dt = y_1^2$ ,  $y_1(0) = 2/(d+1)$ . Letting  $y_1(T_1^*) = 1/2$  we obtain  $T_1^* = (d-3)/2$ . For  $T_2$  we note for  $y \in [1/2, 1]$

$$\frac{1}{4}(1-y) \leq \frac{dy}{dt} \leq 1-y.$$

Comparing with  $y_2(t) = 1 - (1/2)e^{-t}$  which solves the ODE  $dy_2/dt = 1 - y_2$  with  $y_2(0) = 1/2$ , we have  $T_2^* = \log(2\delta)^{-1}$  such that  $y_2(T_2^*) = 1 - \delta$ . To summarize we have

$$T_0 \leq 2T_1^* + 4T_2^* = d - 3 + 4 \log(2\delta)^{-1}. \quad \text{■}$$

*Proof of Proposition 2.* From the ODE in Eq. (3.2) we have

$$\frac{dV_1^2}{dt} = 2|\psi - 3| V_1^2 \left( V_1^2 - \sum_{i=1}^d V_i^4 \right).$$

Combining both Lemmas 2 and 3 we have

$$2|\psi - 3| V_1^4 (1 - V_1^2) \geq \frac{dV_1^2}{dt} \geq |\psi - 3| V_1^4 (1 - V_1^2).$$

If the starting value of algorithm has  $V_1^2 \geq 2 \max_{k>1} V_k^2$  then  $V_1^2 \geq 2/(d+1)$ . By comparison theorem in ODE [23] we know  $V_1^2(t)$  runs the auxiliary ODE Eq. (3.4) at a nonconstant rate within  $[|\psi-3|, 2|\psi-3|]$ . Therefore the time

$$\frac{1}{2}|\psi-3|^{-1}T_0 \leq T \leq |\psi-3|^{-1}T_0.$$

Combining with Lemma 4 we are done. ■

## B Detailed Proofs in Section 4

### B.1 Proof of Theorem 2

*Proof.* Proposition 3 implies for  $U_k^\beta(t) = \beta^{-1/2} v_k^{\beta, (\lfloor t\beta^{-1} \rfloor)}$ , under the conditions in Theorem 2 the one-step increment on coordinate  $k$  is

$$U_k^\beta(\beta) - U_k^\beta(0) = \beta^{-1/2} \left( v_k^{\beta, (1)} - v_k^{\beta, (0)} \right) = \beta^{-1/2} \beta \left( (\mathbf{v}^\top \mathbf{Y})^3 Y_k - v_k (\mathbf{v}^\top \mathbf{Y})^4 \right) + \beta^{-1/2} R_k.$$

Eq. (A.7) implies that the infinitesimal mean is

$$\begin{aligned} \frac{d}{dt} \mathbb{E} U_k^\beta(t) \Big|_{t=0} &= \beta^{-1} \mathbb{E} \left[ U_k^\beta(\beta) - U_k^\beta(0) \mid \mathbf{V}^\beta(0) = \mathbf{v}, \mathbf{U}^\beta(0) = \mathbf{u} \right] \\ &= \beta^{-1} \beta^{-1/2} \cdot \beta |\psi-3| v_k \left( v_k^2 - \sum_{i=1}^d v_i^4 \right) + \beta^{-1} \beta^{-1/2} \cdot E_k(\mathbf{v}) \\ &= -|\psi-3| u_k + o(1). \end{aligned}$$

Using Eq. (A.6) we have the infinitesimal variance

$$\begin{aligned} \frac{d}{dt} \mathbb{E} (U_k^\beta(t) - U_k^\beta(0))^2 \Big|_{t=0} &= \beta^{-1} \mathbb{E} \left[ (U_k^\beta(\beta) - U_k^\beta(0))^2 \mid \mathbf{V}^\beta(0) = \mathbf{v} \right] \\ &= \beta^{-2} \mathbb{E} \left[ \left( v_k^{\beta, (1)} - v_k^{\beta, (0)} \right)^2 \mid \mathbf{V}^\beta(0) = \mathbf{v} \right] \\ &= \mathbb{E} (Y_1^3 Y_k)^2 + o(1) = \psi_6 + o(1). \end{aligned}$$

In addition  $|U_k^\beta(t) - U_k^\beta(0)| \leq CB^2\beta$ . Applying standard infinitesimal generator argument [17, Sec. 7.4] one can conclude that as  $\beta \rightarrow 0^+$ , the Markov process  $U_k^\beta(t)$  converges weakly to  $U_k(t)$  the solution to Eq. (4.1). ■

### B.2 Proof of Theorem 3

We first prove an auxillary lemma on moment calculations. Proof is deferred to Subsection C.2

**Lemma B.1.** We have for each  $k = 1, \dots, d$  the following moment expressions:

$$\mathbb{E} \left( \sum_{i=1}^d Y_i \right)^6 Y_k^2 = \psi_8 + 16(d-1)\psi_6 + 15(d-1)\psi_4^2 + 60(d-1)(d-2)\psi_4 + 30(d-1)(d-2)(d-3),$$

and

$$\mathbb{E} \left( \sum_{i=1}^d Y_i \right)^8 = d\psi_8 + 28d(d-1)\psi_6 + 35d(d-1)(1+12(d-1)(d-2))\psi_4 + 105d(d-1)(d-2)(d-3).$$

*Proof of Theorem 3.* Note from the definition in Eq. (4.3) we have for distinct coordinate pair  $k, k'$ ,

$$\beta^{1/2} W_{kk'} = \log(v_k^2) - \log(v_{k'}^2). \quad (\text{B.1})$$

By symmetry we without loss of generality that  $v_k^{(0)}, v_{k'}^{(0)} > 0$  and hence

$$W_{kk'}^\beta(\beta) - W_{kk'}^\beta(0) = 2\beta^{-1/2} \log \left( \frac{v_k^{(1)}}{v_k^{(0)}} \right) - 2\beta^{-1/2} \log \left( \frac{v_{k'}^{(1)}}{v_{k'}^{(0)}} \right).$$

However Proposition 3 indicates that

$$\log \left( \frac{v_k^{(1)}}{v_k^{(0)}} \right) = \frac{v_k^{(1)} - v_k^{(0)}}{v_k^{(0)}} + \mathcal{O}(\beta^2) = \beta (\mathbf{v}^\top \mathbf{Y})^3 \frac{Y_k}{v_k} - \beta (\mathbf{v}^\top \mathbf{Y})^4 + \mathcal{O}(\beta^2),$$

and analogously for  $k'$ . For infinitesimal mean

$$\begin{aligned} \left. \frac{d}{dt} \mathbb{E}(W_{kk'}^\beta(t) - W_{kk'}^\beta(0)) \right|_{t=0} &= \beta^{-1} \mathbb{E} \left[ W_{kk'}^\beta(\beta) - W_{kk'}^\beta(0) \mid W_{kk'}^\beta(0) = W_{kk'} \right] \\ &= \beta^{-1} \cdot 2\beta^{-1/2} \mathbb{E} \left[ \beta (\mathbf{v}^\top \mathbf{Y})^3 \left( \frac{Y_k}{v_k} - \frac{Y_{k'}}{v_{k'}} \right) + \mathcal{O}(\beta^2) \right] \end{aligned}$$

Since  $\mathbb{E} \left[ (\mathbf{v}^\top \mathbf{Y})^3 (Y_k/v_k) \right] = 3 + (\psi - 3)v_k^2$ , and analogously for  $k'$ , and also  $(v_k^{\beta,(0)})^2 \rightarrow 1$ , we conclude from Eq. (B.1) that

$$\begin{aligned} 2(\psi - 3)\beta^{-1/2} \left( (v_k^{\beta,(0)})^2 - (v_{k'}^{\beta,(0)})^2 \right) &= 2(\psi - 3)\beta^{-1/2} \cdot \frac{1}{d} \cdot \log \left( \frac{v_k^{\beta,(0)}}{v_{k'}^{\beta,(0)}} \right)^2 + \mathcal{O}(\beta) \\ &\rightarrow \frac{2(\psi - 3)}{d} W_{kk'}. \end{aligned}$$

For infinitesimal variance

$$\begin{aligned} \left. \frac{d}{dt} \mathbb{E}(W_{kk'}^\beta(t) - W_{kk'}^\beta(0))^2 \right|_{t=0} &= \beta^{-1} \mathbb{E} \left[ \left( W_{kk'}^\beta(\beta) - W_{kk'}^\beta(0) \right)^2 \mid W_{kk'}^\beta(0) = W_{kk'} \right] \\ &= 4\beta^{-2} \mathbb{E} \left[ \left( \log \left( \frac{v_k^{(1)}}{v_k^{(0)}} \right) - \log \left( \frac{v_{k'}^{(1)}}{v_{k'}^{(0)}} \right) \right)^2 \mid W_{kk'}^\beta(0) = W_{kk'} \right] \\ &= 4\mathbb{E} \left[ \left( (\mathbf{v}^* \top \mathbf{Y})^3 \frac{Y_k}{v_k} - (\mathbf{v}^* \top \mathbf{Y})^3 \frac{Y_{k'}}{v_{k'}} \right)^2 + \mathcal{O}(\beta) \right]. \end{aligned}$$

Note the second-order term

$$\mathbb{E} \left[ (\mathbf{v}^\top \mathbf{Y})^6 \left( \frac{Y_k}{v_k} \right)^2 \mid W_{kk'}^\beta(0) = W_{kk'} \right] = 4d^{-2} \cdot \mathbb{E} \left( \sum_{i=1}^d Y_i \right)^6 Y_k^2 \equiv 4d^{-2} Q_1,$$

and similarly for index  $k'$ . For the cross term in the expectation we have

$$\mathbb{E} \left[ (\mathbf{v}^\top \mathbf{Y})^6 \frac{Y_k}{v_k} \cdot \frac{Y_{k'}}{v_{k'}} \mid W_{kk'}^\beta(0) = W_{kk'} \right] = 4d^{-2} \cdot \mathbb{E} \left( \sum_{i=1}^d Y_i \right)^6 Y_k Y_{k'} \equiv 4d^{-2} Q_2.$$

From standard polynomial manipulations we have

$$dQ_1 + d(d-1)Q_2 = d\psi_8 + 28d(d-1)\psi_6 + 35d(d-1)(1+12(d-1)(d-2))\psi_4 + 105d(d-1)(d-2)(d-3),$$

and

$$Q_1 = \psi_8 + 16(d-1)\psi_6 + 15(d-1)\psi_4^2 + 60(d-1)(d-2)\psi_4 + 30(d-1)(d-2)(d-3).$$

Therefore

$$\begin{aligned} Q_1 - Q_2 &= \frac{d^2 Q_1 - dQ_1 - d(d-1)Q_2}{d(d-1)} \\ &= \psi_8 + (16d - 28)\psi_6 + 15d\psi_4^2 - 5(72d^2 - 228d + 175)\psi_4 + 15(2d - 7)(d-2)(d-3). \end{aligned}$$

Summarize the above calculations we obtain as  $\beta \rightarrow 0^+$

$$\begin{aligned} \left. \frac{d}{dt} \mathbb{E}(W_{kk'}^\beta(t) - W_{kk'}^\beta(0))^2 \right|_{t=0} &= 4\mathbb{E} \left[ (\mathbf{v}^* \top \mathbf{Y})^3 \frac{Y_k}{v_k} - (\mathbf{v}^* \top \mathbf{Y})^3 \frac{Y_{k'}}{v_{k'}} \right]^2 + \mathcal{O}(\beta) \\ &= 8d^{-2}(Q_1 - Q_2) + \mathcal{O}(\beta). \end{aligned}$$

Combining the last two displays concludes the theorem. ■

## C Proof of Auxillary Results

### C.1 Proof of Proposition 3

For  $\mathbf{v}^{(0)} = \mathbf{v} \in \mathcal{S}^{d-1}$  the update equation becomes

$$\mathbf{v}^{(1)} = \|\mathbf{v} + \beta (\mathbf{v}^\top \mathbf{Y})^3 \mathbf{Y}\|^{-1} \left( \mathbf{v} + \beta (\mathbf{v}^\top \mathbf{Y})^3 \mathbf{Y} \right).$$

For the simplicity for discussion we prove under the condition  $\psi > 3$  (the case of  $\psi < 3$  is analogous). To prove Proposition 3 in the case of  $\psi > 3$ , we first introduce

**Lemma 5.** For  $x \in [0, 1]$  we have

$$\left| (1+x)^{-1/2} - 1 + \frac{x}{2} \right| \leq 2 \left( \frac{x}{2} \right)^2. \quad (\text{C.1})$$

*Proof.* Taylor expansion suggests for  $|x| < 1$

$$(1+x)^{-1/2} = \sum_{n=0}^{\infty} \binom{-\frac{1}{2}}{n} x^n = 1 - \frac{1}{2}x + \frac{3}{8}x^2 - \frac{5}{16}x^3 + \dots$$

which is an alternating series for  $x \in [0, 1]$ , whereas the absolute terms approach to 0 monotonically

$$\left| \binom{-\frac{1}{2}}{n+1} x^{n+1} \right| \leq \left| \binom{-\frac{1}{2}}{n} x^n \right|.$$

This indicates that for  $x \in [0, 1]$

$$\left| (1+x)^{-1/2} - 1 + \frac{1}{2}x \right| \leq \frac{3}{8}x^2 \leq \frac{1}{2}x^2,$$

which completes the proof of Lemma 5. ■

*Proof of Proposition 3.* When Eq. (A.4) is satisfied, and noting  $|\mathbf{v}^\top \mathbf{Y}|^2 \leq \|\mathbf{Y}\|^2 \leq B$ , we have from Eq. (A.4)

$$\beta(\mathbf{v}^\top \mathbf{Y})^4 + \frac{1}{2}\beta^2(\mathbf{v}^\top \mathbf{Y})^6 \|\mathbf{Y}\|^2 \leq B^2\beta + \frac{1}{2}B^4\beta^2 \leq \frac{4}{3}B^2\beta < 1,$$

and hence from Eq. (C.1) in Lemma 5 there exists a  $Q_1(\mathbf{v}, \mathbf{Y})$  with

$$|Q_1(\mathbf{v}, \mathbf{Y})| \leq 2 \left( \beta(\mathbf{v}^\top \mathbf{Y})^4 + \frac{1}{2}\beta^2(\mathbf{v}^\top \mathbf{Y})^6 \|\mathbf{Y}\|^2 \right)^2 \leq \frac{32}{9}B^4\beta^2,$$

such that, with  $Q_2(\mathbf{v}, \mathbf{Y}) = -\frac{1}{2}\beta^2(\mathbf{v}^\top \mathbf{Y})^6 \|\mathbf{Y}\|^2 + Q_1(\mathbf{v}, \mathbf{Y})$ , we have

$$\begin{aligned} \|\mathbf{v} + \beta(\mathbf{v}^\top \mathbf{Y})^3 \mathbf{Y}\|^{-1} &= (1 + 2\beta(\mathbf{v}^\top \mathbf{Y})^4 + \beta^2(\mathbf{v}^\top \mathbf{Y})^6 \|\mathbf{Y}\|^2)^{-1/2} \\ &= 1 - \beta(\mathbf{v}^\top \mathbf{Y})^4 - \frac{1}{2}\beta^2(\mathbf{v}^\top \mathbf{Y})^6 \|\mathbf{Y}\|^2 + Q_1(\mathbf{v}, \mathbf{Y}) \\ &= 1 - \beta(\mathbf{v}^\top \mathbf{Y})^4 + Q_2(\mathbf{v}, \mathbf{Y}), \end{aligned} \quad (\text{C.2})$$

where

$$|Q_2(\mathbf{v}, \mathbf{Y})| \leq \frac{1}{2}B^4\beta^2 + \frac{32}{9}B^4\beta^2 = \frac{73}{18}B^4\beta^2. \quad (\text{C.3})$$

Using Eqs. (C.2) and (C.3) we have

$$\begin{aligned} \hat{v}_k - v_k &= \|\mathbf{v} + \beta(\mathbf{v}^\top \mathbf{Y})^3 \mathbf{Y}\|^{-1} \left( v_k + \beta(\mathbf{v}^\top \mathbf{Y})^3 Y_k \right) - v_k \\ &= (1 - \beta(\mathbf{v}^\top \mathbf{Y})^4 + Q_2(\mathbf{v}, \mathbf{Y})) \left( v_k + \beta(\mathbf{v}^\top \mathbf{Y})^3 Y_k \right) - v_k \\ &= \beta((\mathbf{v}^\top \mathbf{Y})^3 Y_k - v_k(\mathbf{v}^\top \mathbf{Y})^4) + Q_3(\mathbf{v}, \mathbf{Y}), \end{aligned} \quad (\text{C.4})$$

where

$$Q_3(\mathbf{v}, \mathbf{Y}) = \left( v_k + \beta(\mathbf{v}^\top \mathbf{Y})^3 Y_k \right) Q_2(\mathbf{v}, \mathbf{Y}) - \beta^2(\mathbf{v}^\top \mathbf{Y})^7 Y_k \quad (\text{C.5})$$

which has the following estimate

$$\begin{aligned} |Q_3(\mathbf{v}, \mathbf{Y})| &\leq \left| v_k + \beta (\mathbf{v}^\top \mathbf{Y})^3 Y_k \right| |Q_2(\mathbf{v}, \mathbf{Y})| + \beta^2 \left| (\mathbf{v}^\top \mathbf{Y})^7 Y_k \right| \\ &\leq (1 + B^2 \beta) \frac{73}{18} B^4 \beta^2 + B^4 \beta^2 \leq 9B^4 \beta^2. \end{aligned} \quad (\text{C.6})$$

Denoting  $Q_3(\mathbf{v}, \mathbf{Y})$  by the random variable  $R_k$ , Eqs. (C.4), (C.5), (C.6) together concludes (i) of Prop. 3.

For (ii), note Eq. (A.5) gives

$$\left| v_k^{(1)} - v_k^{(n)} \right| \leq \beta (\|\mathbf{Y}\|^2 + \|\mathbf{Y}\|^2) + 9B^4 \beta^2 \leq 8B^2 \beta,$$

so it is concluded.

For (iii), we set  $E_k(\mathbf{v}) = \mathbb{E}[R_k \mid \mathbf{v}^{(0)} = \mathbf{v}]$ . Under Assumption 1 we take conditional expectation on  $\mathbf{v}^{(n)} = \mathbf{v}$  on both sides of Eq. (A.5) to obtain

$$\begin{aligned} \mathbb{E} \left[ v_k^{(1)} - v_k^{(0)} \mid \mathbf{v}^{(0)} = \mathbf{v} \right] &= \beta \mathbb{E} \left[ (\mathbf{v}^\top \mathbf{Y})^3 Y_k - v_k (\mathbf{v}^\top \mathbf{Y})^4 \mid \mathbf{v}^{(0)} = \mathbf{v} \right] + \mathbb{E} [R_k \mid \mathbf{v}^{(0)} = \mathbf{v}] \\ &= \beta(\psi - 3)v_k \left( v_k^2 - \sum_{i=1}^d v_i^4 \right) + E_k(\mathbf{v}). \end{aligned} \quad (\text{C.7})$$

Similar to the proof of Lemma 1 in Subsection A.1 we quote another polynomial expansion [9]

$$\left( \sum x_i \right)^3 = \sum x_i^3 + 3 \sum x_i^2 x_j + 6 \sum x_{i_1} x_{i_2} x_{i_3}.$$

where the summations above iterate through all monomial terms. Plugging in  $x_i = v_i Y_i$  and taking conditional expectations, we conclude that under Assumption 1

$$\begin{aligned} \mathbb{E} \left[ (\mathbf{v}^\top \mathbf{Y})^3 Y_k \mid \mathbf{v}^{(0)} = \mathbf{v} \right] &= v_k^3 \mathbb{E}(Y_i^4) + 3 \sum_{i:i \neq k} v_i^2 v_k \mathbb{E}(Y_i^2) \mathbb{E}(Y_k^2) \\ &= \psi v_k^3 + 3(1 - v_k^2) v_k = 3v_k + (\psi - 3)v_k^3. \end{aligned} \quad (\text{C.8})$$

In Eq. (A.1) we have

$$\begin{aligned} \mathbb{E} \left[ (\mathbf{v}^\top \mathbf{Y})^3 Y_k - v_k (\mathbf{v}^\top \mathbf{Y})^4 \mid \mathbf{v}^{(0)} = \mathbf{v} \right] &= 3v_k + (\psi - 3)v_k^3 - v_k \left( 3 + (\psi - 3) \sum_{i=1}^d v_i^4 \right) \\ &= (\psi - 3)v_k \left( v_k^2 - \sum_{i=1}^d v_i^4 \right). \end{aligned} \quad (\text{C.9})$$

Combining Eqs. (C.7) and (C.9) completes the proof. ■

## C.2 Proof of Lemma B.1

*Proof.* As in proof of Lemmas 1 and Proposition 3, we have the final polynomial expansions [9] that

$$\left( \sum x_i \right)^6 = \sum x_i^6 + 15 \sum x_i^4 x_j^2 + 90 \sum x_i^2 x_j^2 x_k^2 + \text{terms that has odd-order factors},$$

and using some combinatorics counting we have

$$\begin{aligned} \left( \sum x_i \right)^8 &= \sum x_i^8 + 28 \sum x_i^6 x_j^2 + 70 \sum x_i^4 x_j^4 + 420 \sum x_i^4 x_j^2 x_k^2 \\ &\quad + 2520 \sum x_i^2 x_j^2 x_k^2 x_l^2 + \text{terms that has odd-order factors}. \end{aligned}$$

Therefore to show the first equality, note from Assumption 1 we can assume WLOG that  $k = 1$ . Thus

$$\begin{aligned} \mathbb{E} \left( \sum_{i=1}^d Y_i \right)^6 Y_1^2 &= \sum_{i=1}^d \mathbb{E} Y_i^6 Y_1^2 + 15 \sum_{1 \leq i < j \leq d} \mathbb{E} Y_i^4 Y_j^2 Y_1^2 + 15 \sum_{1 \leq i < j \leq d} \mathbb{E} Y_j^4 Y_i^2 Y_1^2 \\ &\quad + 90 \sum_{1 \leq i < j < k \leq d} \mathbb{E} Y_i^2 Y_j^2 Y_k^2 Y_1^2 \end{aligned}$$

$$\begin{aligned}
&= \mathbb{E}Y_1^8 + 15 \sum_{2 \leq j \leq d} \mathbb{E}Y_1^6 Y_j^2 + 15 \sum_{2 \leq j \leq d} \mathbb{E}Y_1^4 Y_j^4 + 90 \sum_{2 \leq j < k \leq d} \mathbb{E}Y_1^4 Y_j^2 Y_k^2 + \sum_{i=2}^d \mathbb{E}Y_i^6 Y_1^2 \\
&\quad + 15 \sum_{2 \leq i < j \leq d} \mathbb{E}Y_i^4 Y_j^2 Y_1^2 + 15 \sum_{2 \leq i < j \leq d} \mathbb{E}Y_j^4 Y_i^2 Y_1^2 + 90 \sum_{2 \leq i < j < k \leq d} \mathbb{E}Y_i^2 Y_j^2 Y_k^2 Y_1^2 \\
&= \psi_8 + 15(d-1)\psi_6 + 15(d-1)\psi_4^2 + 90 \binom{d-1}{2} \psi_4 + (d-1)\psi_6 \\
&\quad + 15 \binom{d-1}{2} \psi_4 + 15 \binom{d-1}{2} \psi_4 + 90 \binom{d-1}{3} \\
&= \psi_8 + 16(d-1)\psi_6 + 15(d-1)\psi_4^2 + 60(d-1)(d-2)\psi_4 + 30(d-1)(d-2)(d-3).
\end{aligned}$$

Also

$$\begin{aligned}
\mathbb{E} \left( \sum_{i=1}^d Y_i \right)^8 &= \sum_{i=1}^d \mathbb{E}Y_i^8 + 28 \sum_{1 \leq i < j \leq d} \mathbb{E}Y_i^6 \mathbb{E}Y_j^2 + 28 \sum_{1 \leq j < i \leq d} \mathbb{E}Y_i^6 \mathbb{E}Y_j^2 + 70 \sum_{1 \leq i < j \leq d} \mathbb{E}Y_i^4 \mathbb{E}Y_j^4 \\
&\quad + 420 \sum_{i < j < k} \mathbb{E}Y_i^4 \mathbb{E}Y_j^2 \mathbb{E}Y_k^2 + 420 \sum_{j < i < k} \mathbb{E}Y_i^4 \mathbb{E}Y_j^2 \mathbb{E}Y_k^2 \\
&\quad + 420 \sum_{j < k < i} \mathbb{E}Y_i^4 \mathbb{E}Y_j^2 \mathbb{E}Y_k^2 + 2520 \sum_{i < j < k < l} \mathbb{E}Y_i^2 \mathbb{E}Y_j^2 \mathbb{E}Y_k^2 \mathbb{E}Y_l^2,
\end{aligned}$$

which is equal to

$$\begin{aligned}
&d\psi_8 + 28 \binom{d}{2} \psi_6 + 28 \binom{d}{2} \psi_6 + 70 \binom{d}{2} \psi_4 \\
&\quad + 420(d-1) \binom{d}{3} \psi_4 + 420(d-1) \binom{d}{3} \psi_4 + 420(d-1) \binom{d}{3} \psi_4 + 2520 \binom{d}{4} \\
&= d\psi_8 + 28d(d-1)\psi_6 + 35d(d-1)(1 + 12(d-1)(d-2))\psi_4 + 105(d-1)(d-2)(d-3).
\end{aligned}$$

This completes the proof. ■
